# Supplementary material
Source: PubMed Central journal article supplement (PMC5440240)
Supplement: supp_WNL.0000000000003957_Supplemental_Data.pdf [file supp_WNL.0000000000003957_Supplemental_Data.pdf]

## Supplementary Data

Table e-1. CAS-to-CEA hazard ratios for the primary and secondary outcome

|                    |                       |                                      | BMI <sup>a</sup>   |                    |                   |                   | Test for trend |
|--------------------|-----------------------|--------------------------------------|--------------------|--------------------|-------------------|-------------------|----------------|
|                    |                       |                                      | <20                | 20-<25             | 25-<30            | ≥30               | p-value        |
| Stroke or death    | Periprocedural period | CAS-to-CEA HR <sup>b</sup><br>95% CI | 1.55<br>0.12-20.23 | 1.25<br>0.71-2.21  | 1.26<br>0.81-1.95 | 1.37<br>0.61-3.06 | 0.15           |
|                    | Postprocedural period | CAS-to-CEA HR <sup>b</sup><br>95% CI | 0.96<br>0.33-2.78  | 1.01<br>0.69-1.47  | 1.01<br>0.69-1.49 | 1.34<br>0.69-2.63 | 0.61           |
| Ipsilateral stroke | Procedural period     | CAS-to-CEA HR <sup>b</sup><br>95% CI | 1.61<br>0.12-21.15 | 1.35<br>0.69-2.68  | 1.33<br>0.81-2.18 | 2.08<br>0.72-6.00 | 0.06           |
|                    | Postprocedural period | CAS-to-CEA HR <sup>c</sup><br>95% CI | NA<br>0.06-1.32    | 0.28<br>1.12-14.47 | 4.02<br>0.17-2.37 | 0.63              | 0.75           |

CAS-to-CEA hazard ratios for the primary outcome (stroke or death) in the periprocedural and postprocedural ( $\leq 120$  days vs.  $>120$  days after randomization) period and for the secondary outcome (ipsilateral stroke) in the procedural and postprocedural ( $\leq 30$  days after procedure vs.  $>30$  days after procedure) period.

Abbreviations: BMI=body mass index; CAS=carotid artery stenting; CEA=carotid endarterectomy; HR=hazard ratio; CI=confidence interval; NA=not applicable.

<sup>a</sup> In kilograms per square meter ( $\text{kg}/\text{m}^2$ ).

<sup>b</sup> Adjusted for: source trial, age, sex, smoking (past or current).

<sup>c</sup> Adjusted for: source trial.

**Table e-2.** Stroke or death risk in periprocedural and postprocedural period with BMI classified into six groups

|                       |             |                          | BMI <sup>a</sup> |           |           |           |           |           | Test for trend<br>p-value |      |
|-----------------------|-------------|--------------------------|------------------|-----------|-----------|-----------|-----------|-----------|---------------------------|------|
|                       |             |                          | <18.5            | 18.5-<20  | 20-<25    | 25-<30    | 30-<35    | ≥35       |                           |      |
| Periprocedural period | CAS         | Number                   | 14               | 17        | 293       | 442       | 156       | 41        | 0.34                      |      |
|                       |             | Events (cumulative risk) | 1 (7%)           | 1 (6%)    | 25 (9%)   | 43 (10%)  | 12 (8%)   | 4 (10%)   |                           |      |
|                       |             | BMI HR <sup>b</sup>      | 0.92             | 0.65      | ref       | 1.19      | 1.12      | 1.68      |                           |      |
|                       |             | 95% CI                   | 0.12-6.81        | 0.09-4.87 |           | 0.72-1.95 | 0.56-2.25 | 0.57-4.93 |                           |      |
|                       | CEA         | Number                   | 7                | 24        | 332       | 486       | 130       | 27        |                           | 0.73 |
|                       |             | Events (cumulative risk) | 1 (14%)          | 0 (0)     | 23 (7%)   | 39 (8%)   | 7 (5%)    | 3 (11%)   |                           |      |
|                       |             | BMI HR <sup>b</sup>      | 1.94             | NA        | ref       | 1.14      | 0.75      | 1.59      |                           |      |
|                       |             | 95% CI                   | 0.25-14.96       |           |           | 0.68-1.92 | 0.32-1.75 | 0.48-5.32 |                           |      |
|                       | Total group | Number                   | 21               | 41        | 625       | 928       | 286       | 68        |                           | 0.44 |
|                       |             | Events (cumulative risk) | 2 (10%)          | 1 (2%)    | 48 (8%)   | 82 (9%)   | 19 (7%)   | 7 (10%)   |                           |      |
|                       |             | BMI HR <sup>b</sup>      | 1.37             | 0.30      | ref       | 1.19      | 0.92      | 1.49      |                           |      |
|                       |             | 95% CI                   | 0.33-5.68        | 0.04-2.19 |           | 0.83-1.70 | 0.54-1.58 | 0.67-3.32 |                           |      |
| Postprocedural period | CAS         | Number                   | 13               | 16        | 261       | 382       | 137       | 36        | 0.34                      |      |
|                       |             | Events (rate/100 PYs)    | 5 (11.2)         | 2 (3.2)   | 49 (5.5)  | 48 (4.1)  | 15 (3.7)  | 4 (3.9)   |                           |      |
|                       |             | BMI HR <sup>b</sup>      | 2.43             | 0.74      | ref       | 0.76      | 1.01      | 1.39      |                           |      |
|                       |             | 95% CI                   | 0.96-6.14        | 0.18-3.08 |           | 0.51-1.13 | 0.56-1.82 | 0.49-3.99 |                           |      |
|                       | CEA         | Number                   | 6                | 22        | 300       | 436       | 119       | 23        |                           | 0.06 |
|                       |             | Events (rate/100 PYs)    | 1 (3.1)          | 7 (10.2)  | 62 (6.2)  | 56 (4.0)  | 18 (4.7)  | 3 (4.2)   |                           |      |
|                       |             | BMI HR <sup>b</sup>      | 0.91             | 1.67      | ref       | 0.68      | 0.82      | 0.72      |                           |      |
|                       |             | 95% CI                   | 0.12-6.74        | 0.76-3.70 |           | 0.47-0.98 | 0.49-1.40 | 0.23-2.29 |                           |      |
|                       | Total group | Number                   | 19               | 38        | 561       | 818       | 256       | 59        |                           | 0.04 |
|                       |             | Events (rate/100 PYs)    | 6 (7.8)          | 9 (6.9)   | 111 (5.9) | 104 (4.0) | 33 (4.2)  | 7 (4.0)   |                           |      |
|                       |             | BMI HR <sup>b</sup>      | 1.98             | 1.32      | ref       | 0.72      | 0.88      | 0.97      |                           |      |
|                       |             | 95% CI                   | 0.86-4.54        | 0.66-2.62 |           | 0.55-0.94 | 0.60-1.30 | 0.45-2.10 |                           |      |

Risk of primary outcome (stroke or death) in periprocedural (≤120 days after randomization) and postprocedural (>120 days after randomization) period in intention-to-treat analysis.

Abbreviations: BMI=body mass index; CAS=carotid artery stenting; CEA=carotid endarterectomy; HR=hazard ratio; CI=confidence interval; PYs=person-years; NA=not applicable; ref=reference category.

<sup>a</sup> In kilograms per square meter (kg/m<sup>2</sup>); normal BMI (20-<25 kg/m<sup>2</sup>) is used as reference category.

<sup>b</sup> Adjusted for: source trial, age, sex, smoking (past or current).

**Table e-3.** All-cause mortality risk in postprocedural period

|                              |             |                       | BMI <sup>a</sup> |          |           |           | Test for trend |
|------------------------------|-------------|-----------------------|------------------|----------|-----------|-----------|----------------|
|                              |             |                       | <20              | 20-<25   | 25-<30    | ≥30       | p-value        |
| <b>Postprocedural period</b> | CAS         | Number                | 29               | 261      | 382       | 173       | 0.11           |
|                              |             | Events (rate/100 PYs) | 7 (6.6)          | 44 (4.8) | 35 (2.9)  | 14 (2.7)  |                |
|                              |             | BMI HR <sup>b</sup>   | 1.65             | ref      | 0.66      | 0.92      |                |
|                              |             | 95% CI                | 0.73-3.71        |          | 0.42-1.03 | 0.49-1.70 |                |
|                              | CEA         | Number                | 28               | 300      | 436       | 142       | 0.02           |
|                              |             | Events (rate/100 PYs) | 6 (5.8)          | 55 (5.4) | 44 (3.1)  | 15 (3.2)  |                |
|                              |             | BMI HR <sup>b</sup>   | 1.43             | ref      | 0.63      | 0.66      |                |
|                              |             | 95% CI                | 0.60-3.38        |          | 0.42-0.94 | 0.37-1.17 |                |
|                              | Total group | Number                | 57               | 561      | 818       | 315       | <0.01          |
|                              |             | Events (rate/100 PYs) | 13 (6.2)         | 99 (5.1) | 79 (3.0)  | 29 (2.9)  |                |
|                              |             | BMI HR <sup>b</sup>   | 1.51             | ref      | 0.64      | 0.74      |                |
|                              |             | 95% CI                | 0.84-2.72        |          | 0.47-0.86 | 0.49-1.12 |                |

Risk of all-cause mortality in postprocedural (>120 days after randomization) period in intention-to-treat analysis.

Abbreviations: BMI=body mass index; CAS=carotid artery stenting; CEA=carotid endarterectomy; PYs=person-years; HR=hazard ratio; CI=confidence interval; ref=reference category.

<sup>a</sup> In kilograms per square meter (kg/m<sup>2</sup>); normal BMI (20-<25 kg/m<sup>2</sup>) is used as reference category.

<sup>b</sup> Adjusted for: source trial, age, sex, smoking (past or current).

**Table e-4.** Baseline characteristics of ICSS patients with and without BMI data

|                                                              | BMI available<br>(n=264) | BMI unavailable<br>(n=1,446) |
|--------------------------------------------------------------|--------------------------|------------------------------|
| Age at randomization in years (mean, SD)                     | 68.7 ( $\pm$ 9.1)        | 70.4 ( $\pm$ 9.1)            |
| Male sex (%)                                                 | 180 (68%)                | 1,027 (71%)                  |
| History of (%):                                              |                          |                              |
| Hypertension                                                 | 175 (67%)                | 1,008 (70%)                  |
| Hyperlipidemia <sup>a</sup>                                  | 169 (64%)                | 916 (63%)                    |
| Diabetes                                                     | 60 (23%)                 | 312 (22%)                    |
| Smoking (past or current)                                    | 207 (79%)                | 1,028 (72%)                  |
| Stroke or TIA >180 days before randomization                 | 122 (46%)                | 440 (30%)                    |
| Coronary heart disease                                       | 85 (33%)                 | 382 (27%)                    |
| Peripheral artery disease                                    | 48 (18%)                 | 227 (16%)                    |
| Score on mRS at baseline (%):                                |                          |                              |
| 0                                                            | 109 (42%)                | 566 (40%)                    |
| 1                                                            | 52 (20%)                 | 381 (27%)                    |
| 2                                                            | 76 (29%)                 | 316 (22%)                    |
| 3                                                            | 20 (8%)                  | 120 (9%)                     |
| 4                                                            | 3 (1%)                   | 33 (2%)                      |
| 5                                                            | 0                        | 4 (<1%)                      |
| Blood pressure at baseline in mmHg (mean, SD):               |                          |                              |
| Systolic                                                     | 161.1 ( $\pm$ 28.5)      | 143.9 ( $\pm$ 21.8)          |
| Diastolic <sup>b</sup>                                       | 86.2 ( $\pm$ 14.2)       | 76.5 ( $\pm$ 11.5)           |
| Degree of ipsilateral stenosis (%):                          |                          |                              |
| Moderate (50-69%)                                            | 19 (7%)                  | 149 (10%)                    |
| Severe ( $\geq$ 70%)                                         | 245 (93%)                | 1,297 (90%)                  |
| Contralateral severe stenosis ( $\geq$ 70%) or occlusion (%) | 59 (22.3%)               | 242 (16.9%)                  |
| Type of most recent event before randomization (%):          |                          |                              |
| Retinal ischemia or amaurosis fugax                          | 63 (24%)                 | 276 (19%)                    |
| TIA                                                          | 107 (41%)                | 469 (33%)                    |
| Hemispheric stroke                                           | 91 (35%)                 | 678 (48%)                    |

Abbreviations: BMI=body mass index; SD=standard deviation; TIA=transient ischemic attack; mRS=modified Rankin Scale.

<sup>a</sup> Defined as hyperlipidemia or taking lipid-lowering medication at randomization.

<sup>b</sup> Data not collected in carotid artery stenting patients.

**Figure e-1.** Distribution of BMI in each trial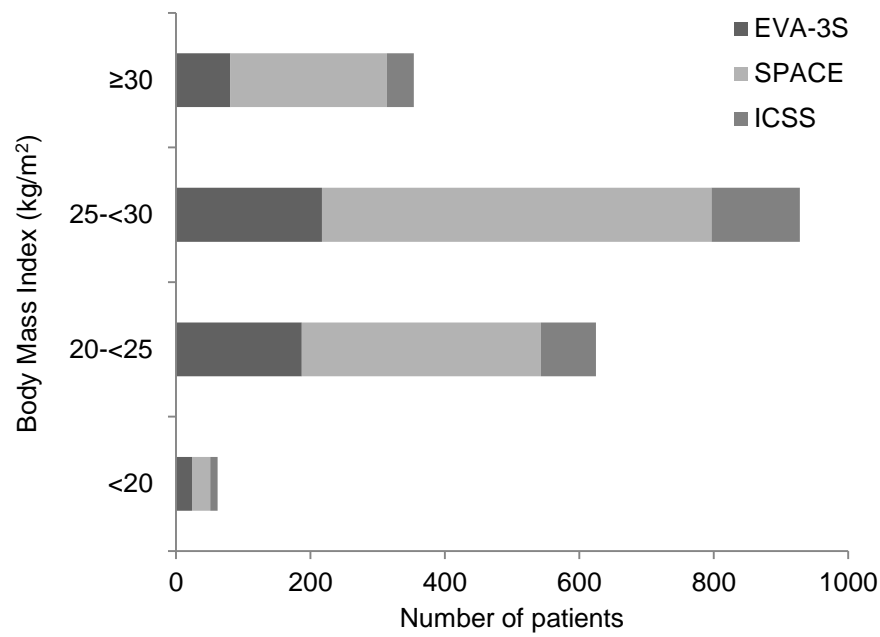

Abbreviations: BMI=body mass index.
